Supplemental Figure 1

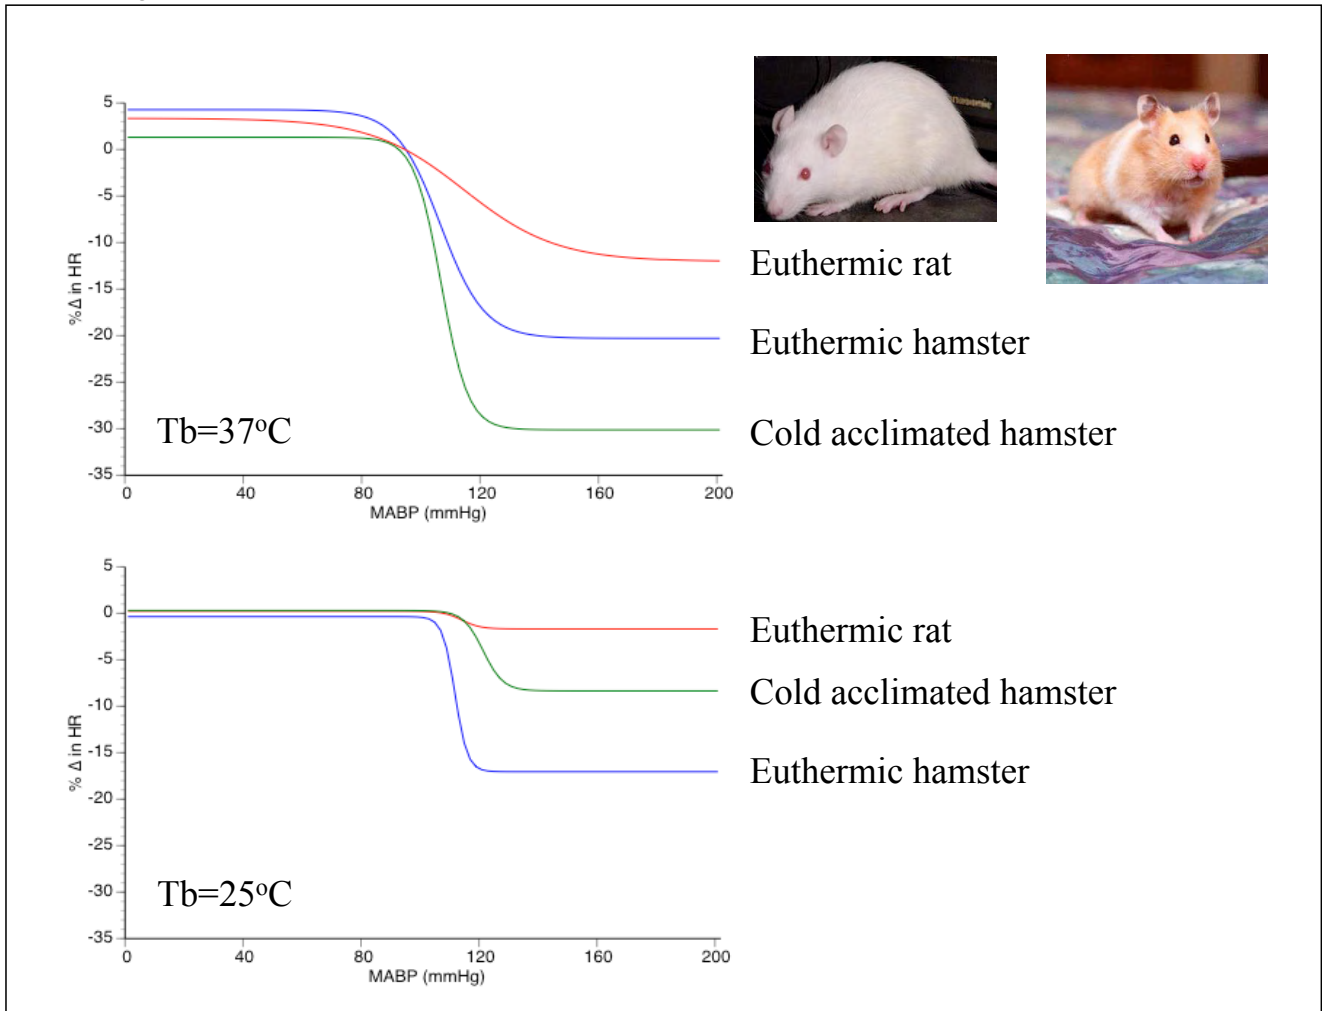

*May & Egginton, unpublished data*

**Fig. S1.** Baroreceptor sensitivity in rodents. Baroreceptor reflex (BRR) curves comparing euthermic rats with euthermic and cold-acclimated hamsters, illustrating the depressed BRR in the non-hibernator (rat) and reversal of sensitivity in the hibernator (hamster).
